# Supplementary material for: Carbon nanotubes for stabilization of nanostructured lipid particles
Source: Royal Society of Chemistry journal article supplement (doi:10.1039/c4nr05593d), 2014-11-20
Supplement: c4nr05593d1.pdf [file c4nr05593d1.pdf]

# Carbon Nanotubes for Stabilization of Nanostructured Lipid Particles

Nicholas P. Gaunt<sup>a</sup>, Yogita Patil-Sen<sup>a</sup>, Matthew J. Baker<sup>a,b</sup>, Chandrashekhar V. Kulkarni<sup>a\*</sup>

Raman spectra for dehydrated lipid particles stabilized by varying concentrations of CNTs are shown in Supplementary Fig. S1.

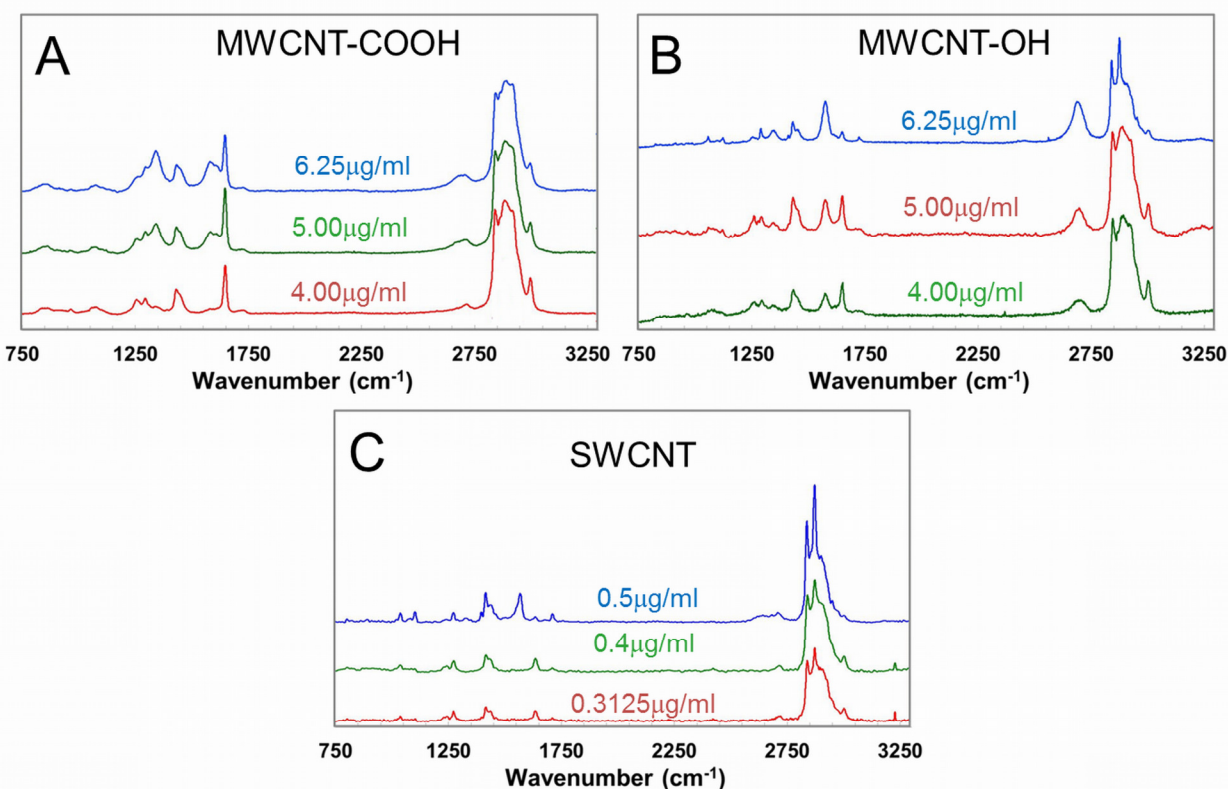

**Fig. S1.** Raman spectra for freeze dried lipid particles along with CNTs used to stabilize them in solution conditions.

## Small Angle X-ray Scattering

Small angle x-ray scattering measurements (1.2-10 degrees) on dehydrated/freeze-dried samples were performed using D2 Phaser (Bruker Instruments, UK). Typical settings of 0.1mm slit and 0.1 mm knife edge distance were used to acquire 1-dimensional data (integrated using DIFFRAC.SUITE over intensity) with LYNXEYE<sup>TM</sup> detector.

Measurements were performed at ambient temperature (20 °C). Small angle x-ray scattering measurements acquired for 20 minutes each as shown in Supplementary Fig. S2.

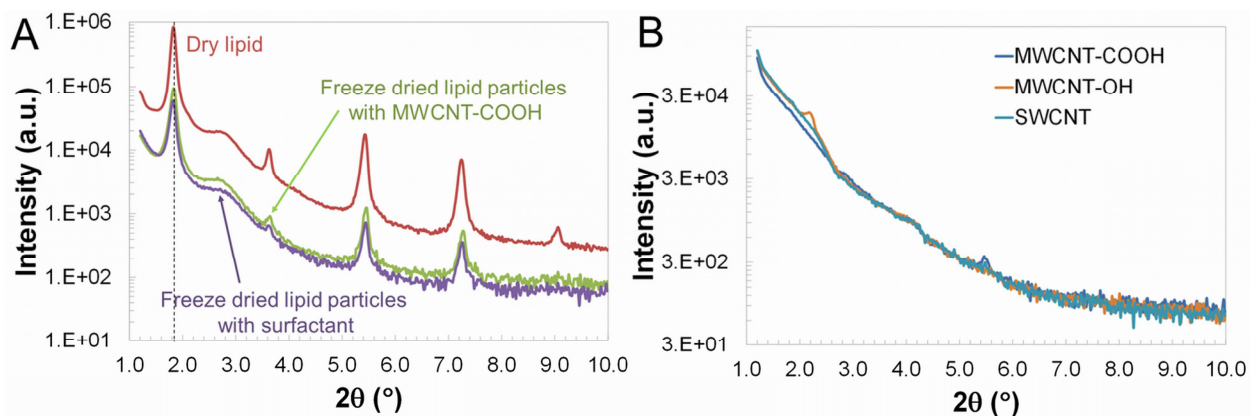

**Fig. S2.** Small angle x-ray scattering patterns of A) dehydrated lipid, MWCNT-COOH stabilized lipid particles and surfactant stabilized lipid particles showing lamellar type of nanostructures and B) powdered CNTs.
